# Supplementary material for: New aspects of the antioxidant properties of phenolic acids: a combined theoretical and experimental approach
Source: Royal Society of Chemistry journal article supplement (doi:10.1039/b904402g), 2009-01-01
Supplement: b904402g.pdf [file b904402g.pdf]

## Supplementary Materials

Relative enthalpies (H) and Gibbs free energy (G) in kcal/mol for the cyclization process. The relative energies are calculated taking **IIb** as the reference. The solvent values are also reported in Fig. 6.

|                   | Gas Phase  |            | Solvent    |            |
|-------------------|------------|------------|------------|------------|
|                   | $\Delta H$ | $\Delta G$ | $\Delta H$ | $\Delta G$ |
| <b>IIb</b>        |            |            |            |            |
| TS1               | 7.5        | 18.1       | 7.8        | 23.8       |
| <b>IIc vs IIb</b> | 4.5        | 5.0        | 9.3        | 10.7       |
| TS2               | 15.5       | 17.8       | 16.2       | 17.0       |
| <b>IId vs IIc</b> | 12.6       | 14.7       | 14.4       | 14.9       |
| <b>IIe vs IIb</b> | 8.3        | 10.2       | 7.9        | 11.3       |
| <b>IIb</b>        |            |            |            |            |
| TSdirect          | 15.0       | 17.4       | 36.9       | 39.2       |
| <b>IIe vs IIb</b> | 8.3        | 10.2       | 7.9        | 11.3       |
| <b>IIf vs IIb</b> | 2.1        | -6.9       | -0.4       | -9.7       |

Rate constants  $k(T=298K)$  calculated within the TST framework using either the Wigner or the Skodje&Truhlar transmission coefficients.  $k$  are given in  $L.mol^{-1}.s^{-1}$  and  $s^{-1}$  for bimolecular and unimolecular, respectively.

|                                             |                                                                | $k^{TST}$             | $\kappa^W(T)$ | $\kappa^{ST}(T)$ | $k^{TST/W}$           | $k^{TST/ST}$          |
|---------------------------------------------|----------------------------------------------------------------|-----------------------|---------------|------------------|-----------------------|-----------------------|
| HAT                                         | $ArOH + CH_3O^{\bullet} \rightarrow ArO^{\bullet} + CH_3OH$    | $5.7 \times 10^5$     | 1.3           | 1.0              | $7.5 \times 10^5$     | $5.7 \times 10^5$     |
|                                             | $ArOH + \bullet CH_2OH \rightarrow ArO^{\bullet} + CH_3OH$     | $2.7 \times 10^{-2}$  | 4.0           | 148.2            | $1.1 \times 10^{-1}$  | $4.0 \times 10^0$     |
| Addition                                    | $ArOH + \bullet CH_2OH \rightarrow \mathbf{Ia}$                | $6.7 \times 10^{-1}$  | 1.1           | 1.1              | $7.1 \times 10^{-1}$  | $7.1 \times 10^{-1}$  |
|                                             | $ArOH + \bullet CH_2OH \rightarrow \mathbf{IIa}$               | $3.0 \times 10^0$     | 1.1           | 1.1              | $3.3 \times 10^0$     | $3.3 \times 10^0$     |
| Reactions of the second stage (cyclisation) | $\mathbf{IIb} + CH_2OH \rightarrow \mathbf{IIc} + CH_3OH$      | $2.3 \times 10^{-5}$  | 2.0           | 1.0              | $4.5 \times 10^{-5}$  | $2.3 \times 10^{-5}$  |
|                                             | $\mathbf{IIc} \rightarrow \mathbf{IId}$                        | $2.2 \times 10^0$     | 1.2           | 1.3              | $2.7 \times 10^0$     | $2.7 \times 10^0$     |
|                                             | $\mathbf{IIb} \rightarrow \mathbf{IIe}$ (direct)               | $1.2 \times 10^{-16}$ | 1.0           | 1.0              | $1.2 \times 10^{-16}$ | $1.2 \times 10^{-16}$ |
| Isomerisation                               | $\bullet CH_2OH + CH_3OH \rightarrow CH_3O^{\bullet} + CH_3OH$ | $8.5 \times 10^6$     | 1.3           | 1.4              | $1.1 \times 10^7$     | $1.2 \times 10^7$     |

$\Delta H$ ,  $\Delta G$  and  $\Delta G^\ddagger$  (kcal/mol) values obtained for the dimerization process for different dimers (*keto* and *enol* forms). Calculations were performed in the gas phase as well as in the presence of the PCM solvent.

| Dimer                | Form        | Gas Phase  |            |                     | Solvent    |            |                     |                       |
|----------------------|-------------|------------|------------|---------------------|------------|------------|---------------------|-----------------------|
|                      |             | $\Delta H$ | $\Delta G$ | $\Delta G^\ddagger$ | $\Delta H$ | $\Delta G$ | $\Delta G^\ddagger$ | $k^{\text{TST}}$      |
| 4-O-5                | <i>Keto</i> | -5.0       | 8.3        | 41.2                | -0.1       | 15.7       | 47.9                | $5.0 \times 10^{-23}$ |
|                      | <i>Enol</i> | -32.9      | -19.6      |                     | -26.1      | -10.7      |                     |                       |
| 5-5'                 | <i>Keto</i> | 1.4        | 14.6       | 47.9                | 4.5        | 17.2       |                     |                       |
|                      | <i>Enol</i> | -47.1      | -33.3      |                     | -41.3      | -25.8      |                     |                       |
| $\alpha$ -O-4        | <i>Keto</i> | -9.2       | 4.2        | 39.5                | -3.3       | 10.2       | 45.2                | $4.7 \times 10^{-21}$ |
|                      | <i>Enol</i> | -31.3      | -17.7      |                     | -21.0      | -5.5       |                     |                       |
| $\alpha$ -5          | <i>Keto</i> | -3.7       | 9.5        |                     | 0.4        | 12.9       |                     |                       |
|                      | <i>Enol</i> | -44.0      | -30.2      |                     | -37.3      | -21.4      |                     |                       |
| $\alpha$ - $\alpha'$ | <i>Keto</i> | -6.9       | 6.9        |                     | -3.2       | 9.8        |                     |                       |
|                      | <i>Enol</i> | -41.1      | -26.9      |                     | -18.5      | -4.6       |                     |                       |

BDEs (kcal/mol) of the 4-OH of ferulic acid (**1**) and the radiolytic compounds (**2**, **3** and **4/5**), in the gas phase and in the presence of the PCM solvent (calculated at the PCM-B3P86/6-31+G(d,p) and PCM-B3LYP/6-31+G(d,p) levels). The BDEs obtained for the acidic OH group of the four different compounds are higher than 100kcal/mol (data not shown). The last column contains the DPPH scavenging (inhibition percentage at a concentration of  $10^{-3}$  M).

| Compounds  | B3P86     |       |      | B3LYP     |       |      | %DPPH scavenging<br>(standard deviation) |
|------------|-----------|-------|------|-----------|-------|------|------------------------------------------|
|            | Gas phase | Water | MeOH | Gas phase | Water | MeOH |                                          |
| <b>1</b>   | 85.4      | 83.3  | 85.4 | 81.5      | 79.2  | 81.3 | 92.0 (1.1)                               |
| <b>2</b>   | 86.1      | 83.3  | 84.7 | 82.3      | 79.5  | 80.6 | 35.7 (0.8)                               |
| <b>3</b>   | 87.1      | 84.1  | 86.3 | 83.3      | 80.0  | 82.2 | 23.6 (0.3)                               |
| <b>4/5</b> | 86.8      | 83.5  | 85.8 | 83.0      | 79.4  | 81.7 | 61.3 (1.1)                               |

$^1\text{H}$  (400 MHz) and  $^{13}\text{C}$  (100 MHz) NMR data spectra and correlations observed in COSY, HMQC, and HMBC of compounds in  $(\text{CD}_3)_2\text{CO}/\text{TMS}$ ;  $\delta$  ppm ( $J$  Hz)

## Compound 2

### Compound 2

| Position             | $^1\text{H}$         | COSY                    | $^{13}\text{C}$ |                                                       |
|----------------------|----------------------|-------------------------|-----------------|-------------------------------------------------------|
|                      |                      |                         | Jmod/HMQC       | HMBC                                                  |
| aromatic ring        |                      |                         |                 |                                                       |
| 1'                   |                      |                         | 127.6           |                                                       |
| 2'                   | 6.65 d (1.5)         |                         | 115.3           | C-4'; C-6'; C-3                                       |
| 3'                   |                      |                         | 150.1           |                                                       |
| 4'                   |                      |                         | 154.9           |                                                       |
| 5'                   | 6.48 d (9.2)         | H-6'                    | 116.8           | C-1' ; C-3'                                           |
| 6'                   | 6.61 dd (8.2 ; 2.5)  | H-5' ; H-2'             | 122.0           | C-2' ; C-4' ; C-3                                     |
| 3'-OCH <sub>3</sub>  | 3.68 s               |                         | 56.8            |                                                       |
| aliphatic moiety     |                      |                         |                 |                                                       |
| 1                    |                      |                         | 181.6           |                                                       |
| 2                    | 2.56 dd (17.1 ; 8.6) | H-3 ; 2-CH <sub>2</sub> | 48.2            | C-1 ; C-3 ; C-1'                                      |
| 3                    | 3.72 m               | H-2 ; 2-CH <sub>2</sub> | 54.0            | C-1 ; C-2 ; 2-CH <sub>2</sub> OH ; C-1' ; C-2' ; C-6' |
|                      | 3.20 m               | H-2 ; 2-CH <sub>2</sub> | 54.0            | C-1 ; C-2 ; 2-CH <sub>2</sub> OH ; C-1' ; C-2' ; C-6' |
| 2-CH <sub>2</sub> OH | 3.43 t (8.3)         | H-2 ; 2-CH <sub>2</sub> | 63.3            | C-1 ; C-2 ; C-3                                       |
|                      | 4.19 t (8.6)         | H-2 ; 2-CH <sub>2</sub> | 63.3            | C-1 ; C-2 ; C-3                                       |

$^1\text{H}$  NMR exhibited (i) three aromatic protons detected at 6.65 ppm (H-2'), 6.48 ppm (H-5') and 6.61 ppm (H-6') and assigned to an asymmetric ring, (ii) three signals corresponding to aliphatic protons, one oxymethylene group (4.19 ppm, 3.43 ppm, 2-CH<sub>2</sub>OH), one methylene group (3.72 ppm, 3.20 ppm, H-3) and one methine group linked to a carbonyl (2.56 ppm, H-2), and (iii) a methoxyl group (3.68 ppm) linked to the aromatic ring. Positions of all protons were confirmed by  $^1\text{H}$ - $^1\text{H}$  COSY NMR.

$^{13}\text{C}$  Jmod highlighted eleven signals: five were assigned to the aliphatic moiety and six to aromatic ring. The aliphatic moiety was formed by one quaternary carbonyl (181.6 ppm, C-1), one tertiary C-linked carbon (48.2 ppm, C-2), one secondary C-linked carbon (54.0 ppm, C-3), one secondary O-linked carbon (63.3 ppm, 2-CH<sub>2</sub>OH) and one primary O-linked carbon (3.68 ppm, 3'-OCH<sub>3</sub>). The aromatic units were constituted by three quaternary carbons, two O-linked (150.1 ppm, C-3' et 154.9 ppm, C-4'), one C-linked (127.6 ppm, C-1') and by three

tertiary carbons (115.3 ppm, C-2'; 116.8 ppm, C-5' et 122.0 ppm). Positions of all carbons were identified by HMQC and HMBC. Finally, **2** was identified as 2-hydroxymethyl-3-[2-methoxy-4-hydroxyphenyl]propanoic acid.

### Compound 3

#### Compound 3

| Position            | <sup>1</sup> H       | COSY        | <sup>13</sup> C |                                      |
|---------------------|----------------------|-------------|-----------------|--------------------------------------|
|                     |                      |             | Jmod/HMQC       | HMBC                                 |
| aromatic ring       |                      |             |                 |                                      |
| 1'                  |                      |             | 132.2           |                                      |
| 2'                  | 7.02 br s            | H-6'        | 111.5           | C-3 ; C-4' ; C-6'                    |
| 3'                  |                      |             | 146.8           | C-1' ; C-5'                          |
| 4'                  |                      |             | 148.7           | C-2' ; C-6'                          |
| 5'                  | 6.80 br s            | H-6'        | 116.0           | C-1' ; C-3'                          |
| 6'                  | 6.80 br s            | H-5' ; H-2' | 120.5           | C-3 ; C-2' ; C-4'                    |
| 3'-OCH <sub>3</sub> | 3.86 s               |             | 56.4            |                                      |
| butyrolactone       |                      |             |                 |                                      |
| 1                   |                      |             | 176.9           |                                      |
| 2                   | 2.82 dd (17.1 ; 8.6) | H-2 ; H-3   | 36.3            | C-1 ; C-3 ; C-4 ; C-1'               |
|                     | 2.68 dd (17.1 ; 9.8) | H-2 ; H-3   | 36.3            | C-1 ; C-3 ; C-4 ; C-1'               |
| 3                   | 3.79 br quin (8.4)   | H-2 ; H-4   | 41.9            | C-1 ; C-2 ; C-4 ; C-1' ; C-2' ; C-6' |
| 4                   | 4.60 t (8.3 ; 8.2)   | H-3 ; H-4   | 74.7            | C-2 ; C-3 ; C-1'                     |
|                     | 4.19 t (8.6)         | H-3 ; H-4   | 74.7            | C-2 ; C-3 ; C-1'                     |

<sup>1</sup>H and <sup>13</sup>C Jmod NMR data exhibited similarities between **2** and **3**, actually both compounds possess the same aromatic ring. The difference between these two compounds was the presence of a pentagonal ring for **3** with one quaternary carbonyl (176.9 ppm, C-2) and two methylene groups: one C-linked (2.82 ppm, 2.68 ppm, H-2) and one O-linked (4.60 ppm, 4.19 ppm, H-4). The <sup>1</sup>H-<sup>1</sup>H COSY, <sup>1</sup>H-<sup>13</sup>C HMQC, <sup>1</sup>H-<sup>13</sup>C and HMBC correlations confirmed that **3** was 3-(3-methoxy-4-hydroxyphenyl)- $\gamma$ -butyrolactone.

## Compounds 4/5

### Compound 4

| Position             | <sup>1</sup> H              | COSY                       | <sup>13</sup> C |                                          |
|----------------------|-----------------------------|----------------------------|-----------------|------------------------------------------|
|                      |                             |                            | Jmod/HMQC       | HMBC                                     |
| aromatic ring        |                             |                            |                 |                                          |
| 1'                   |                             |                            | 130.2           |                                          |
| 2'                   | 6.94 d (2.0)                | H-6'                       | 112.9           | C-3 ; C-4' ; C-6'                        |
| 3'                   |                             |                            | 148.4           | C-1' ; C-5'                              |
| 4'                   |                             |                            | 146.8           | C-2' ; C-6'                              |
| 5'                   | 6.80 d (8.2)                | H-6'                       | 116.0           | C-1' ; C-3'                              |
| 6'                   | 6.74 dd (8.2 ; 2.0)         | H-2' ; H-5'                | 121.4           | C-3 ; C-2' ; C-4'                        |
| 3'-OCH <sub>3</sub>  | 3.82 s                      |                            | 56.3            |                                          |
| butyrolactone        |                             |                            |                 |                                          |
| 1                    |                             |                            | 177.9           |                                          |
| 2                    | 3.03 ddd (11.0 ; 7.0 ; 4.0) | H-7 ; 2-CH <sub>2</sub> OH | 48.1            | C-4 ; C-1'                               |
| 3                    | 3.89 ddd (11.8 ; 6.8 ; 5.1) | H-8 ; H-10                 | 44.6            | C-1 ; 2-CH <sub>2</sub> OH ; C-2' ; C-6' |
| 4                    | 4.59 dd (8.8 ; 6.8)         | H-7                        | 73.4            | C-2 ; C-1'                               |
|                      | 4.52 dd (8.8 ; 3.6)         | H-7                        | 73.4            | C-2 ; C-1'                               |
| 2-CH <sub>2</sub> OH | 3.62 dd (10.8 ; 4.0)        | H-7                        | 59.7            | C-1 ; C-3                                |
|                      | 3.43 dd (10.6 ; 7.0)        | H-7                        | 59.7            | C-1 ; C-3                                |

### Compound 5

| Position             | <sup>1</sup> H       | COSY                       | <sup>13</sup> C |                                          |
|----------------------|----------------------|----------------------------|-----------------|------------------------------------------|
|                      |                      |                            | Jmod/HMQC       | HMBC                                     |
| aromatic ring        |                      |                            |                 |                                          |
| 1'                   |                      |                            | 131.2           |                                          |
| 2'                   | 7.09 d (1.9)         | H-6'                       | 112.0           | C-3 ; C-4' ; C-6'                        |
| 3'                   |                      |                            | 148.8           | C-1' ; C-5'                              |
| 4'                   |                      |                            | 147.0           | C-2' ; C-6'                              |
| 5'                   | 6.81 d (8.1)         | H-6'                       | 116.1           | C-1' ; C-3'                              |
| 6'                   | 6.85 dd (8.1 ; 1.9)  | H-5' ; H-2'                | 121.4           | C-3 ; C-2' ; C-4'                        |
| 3'-OCH <sub>3</sub>  | 3.86 s               |                            | 56.4            |                                          |
| butyrolactone        |                      |                            |                 |                                          |
| 1                    |                      |                            | 177.5           |                                          |
| 2                    | 2.87 dt (7.9 ; 3.3)  | H-7 ; 8-CH <sub>2</sub> OH | 50.4            | C-4 ; C-1'                               |
| 3                    | 2.80 dd (10.5 ; 8.4) | H-8 ; H-10                 | 43.4            | C-1 ; 2-CH <sub>2</sub> OH ; C-2' ; C-6' |
| 4                    | 4.53 dd (8.8 ; 3.6)  | H-7                        | 72.7            | C-2 ; C-1'                               |
|                      | 4.16 dd (10.3 ; 8.7) | H-7                        | 72.7            | C-2 ; C-1'                               |
| 2-CH <sub>2</sub> OH | 3.95 dd (11.1 ; 3.0) | H-7                        | 58.8            | C-1 ; C-3                                |
|                      | 3.66 dd (10.8 ; 3.5) | H-7                        | 58.8            | C-1 ; C-3                                |

<sup>1</sup>H and <sup>13</sup>C Jmod NMR of **4** and **5** demonstrated the same aromatic ring than **2** and **3**, and the same tetrahydrofuran ring than **3**, except the presence of a hydroxymethyl group linked to

the tetrahydrofuran ring for **4/5** (see Table). Compounds **4** and **5** both correspond to 2-hydroxy-3-(3-methoxy-4-hydroxyphenyl)- $\gamma$ -butyrolactone.

Slight differences were observed between **4** and **5**, i.e. [(11.0; 4.0 for H-2) and (11.8; 6.8 for H-3)] and [(7.9; 3.3 for H-2) and (10.5; 8.4 for H-3)] for **4** and **5**, respectively. Additionally these two compounds exhibited different retention times (12 and 13 min for **4** and **5**, respectively) and retarding factors (0.64 and 0.58 for **4** and **5**, respectively). Such differences allowed us to conclude that **4** and **5** are diastereoisomers.
